# Supplementary material for: Adhesive and biodegradable polymer mixture composed of high -biosafety pharmaceutical excipients as non-setting periodontal dressing
Source: Royal Society of Chemistry journal article supplement (doi:10.1039/d3bm01314f), 2023-01-01
Supplement: d3bm01314f3.pdf [file d3bm01314f3.pdf]

## Supplementary Information

# Adhesive and biodegradable polymer mixture composed of high bio-safety pharmaceutical excipients as non-setting periodontal dressing

Xiaodan Zhao,<sup>‡a</sup> Meiwen Li,<sup>‡a</sup> Meng Li,<sup>b</sup> Wenbo Li,<sup>a</sup> Ang Li,<sup>a</sup> Yilong Cheng<sup>\*b</sup> and Dandan Pei<sup>\*a</sup>

<sup>a</sup>Key Laboratory of Shaanxi Province for Craniofacial Precision Medicine Research, College of Stomatology, Xi'an Jiaotong University, Xi'an, 710049, China

<sup>b</sup>School of Chemistry, Xi'an Jiaotong University, Xi'an, 710049, China

<sup>‡</sup>These authors contributed equally.

<sup>\*</sup>E-mail: yilongcheng@mail.xjtu.edu.cn

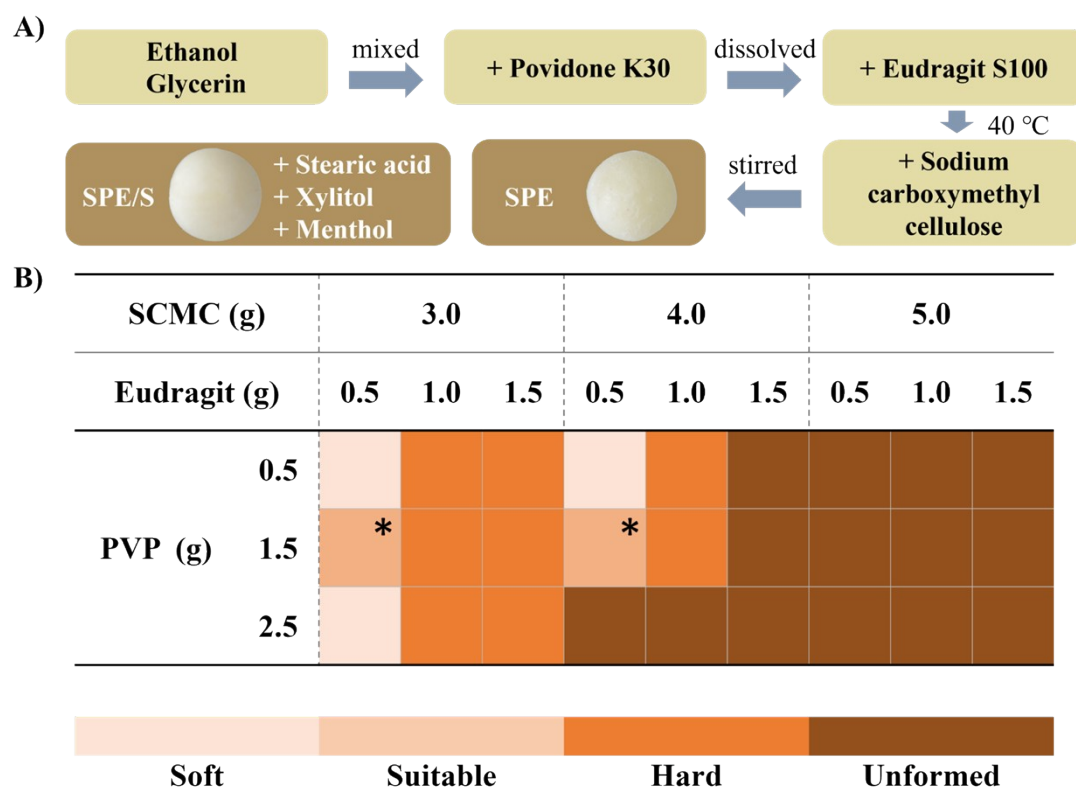

**Fig. S1.** (A) Schematic illustration of the preparation process of the SPE and SPE/S. (B) Macro traits of SPE with different ratios of solutes. \*: ratios of SPE with suitable macro trait.

**Table S1.** Composition of the optimized mixtures (SPE-1 and SPE-2) and the mixtures with additives (SPE/S-1 and SPE/S-2).

| Mixture groups | Solvent (g)      | Polymers (g) |         |               | Additives (g)                              |
|----------------|------------------|--------------|---------|---------------|--------------------------------------------|
|                | Ethyl + Glycerin | SCMC         | PVP K30 | Eudragit S100 | Stearic acid + Xylitol + Menthol (20:15:1) |
| SPE-1          | 4.0              | 3.0          | 1.5     | 0.5           | 0.00                                       |
| SPE-2          | 4.0              | 4.0          | 1.5     | 0.5           | 0.00                                       |
| SPE/S-1        | 4.0              | 3.0          | 1.5     | 0.5           | 0.36                                       |
| SPE/S-2        | 4.0              | 4.0          | 1.5     | 0.5           | 0.36                                       |

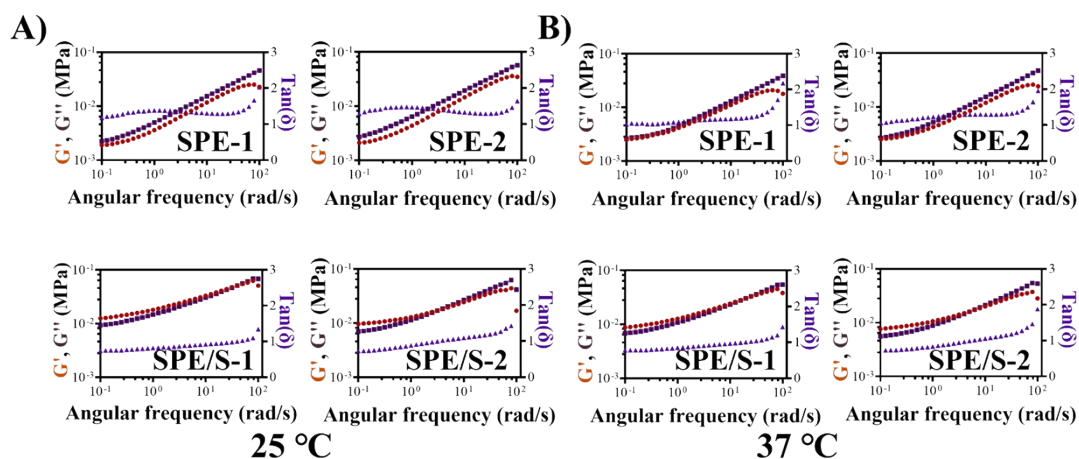

**Fig. S2.** Angular frequency dependence of storage modulus ( $G'$ ) and loss modulus ( $G''$ ) in the linear viscoelastic regime at different temperatures. (A) 25 °C. (B) 37 °C.

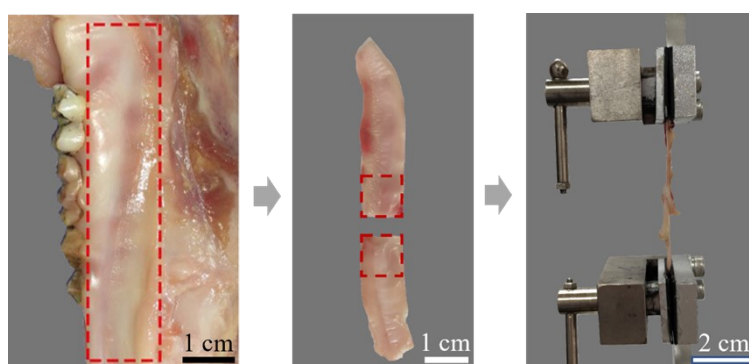

**Fig. S3.** Experimental set-up for the lap-shear test.

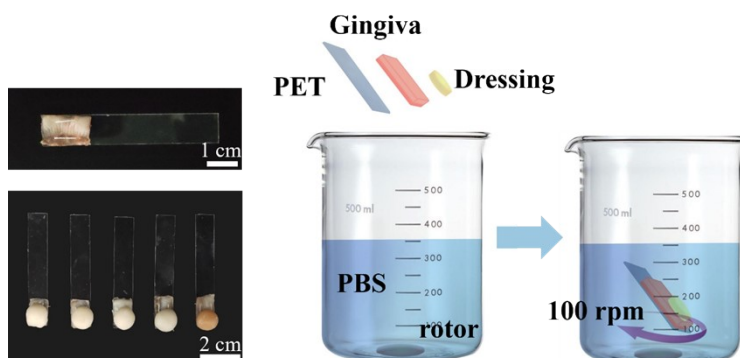

**Fig. S4.** Experimental set-up for in vitro residence time measurement using the rotating disc method (rotating speed = 100 rpm).

**Table S2.** The pH value of the optimized mixtures (SPE-1 and SPE-2) and the mixtures with additives (SPE/S-1 and SPE/S-2).

| Groups  | pH value      |
|---------|---------------|
| SPE-1   | $7.4 \pm 0.1$ |
| SPE-2   | $7.5 \pm 0.1$ |
| SPE/S-1 | $7.3 \pm 0.1$ |
| SPE/S-2 | $7.4 \pm 0.1$ |

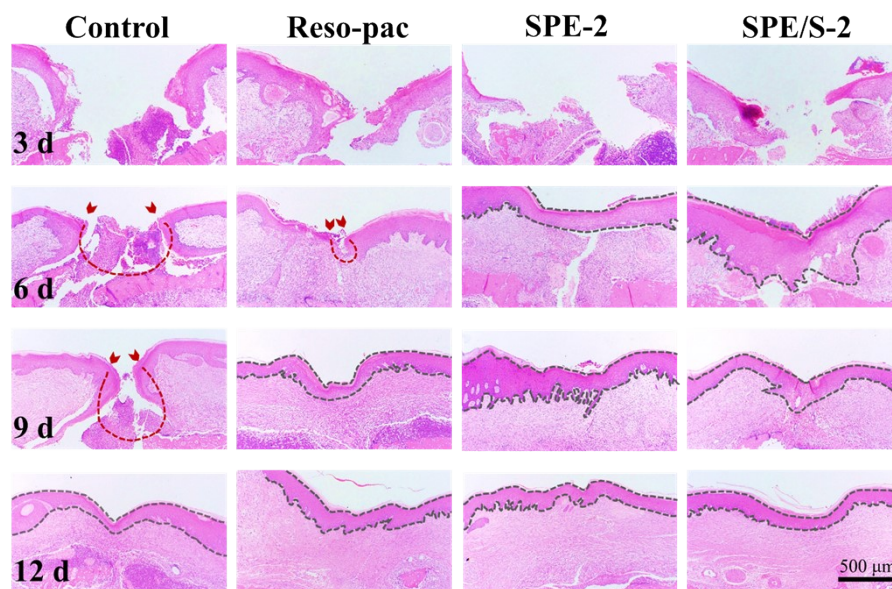

**Fig. S5.** H&E staining of palate full-thickness defects in SD rats treated with SPE-2, SPE/S-2, Reso-pac® and non-treatment after 3, 6, 9 and 12 days; red arrows and dashed circles indicate tissue defects, grey dashed lines indicate completely epithelium. Scale bar: 500  $\mu$ m.

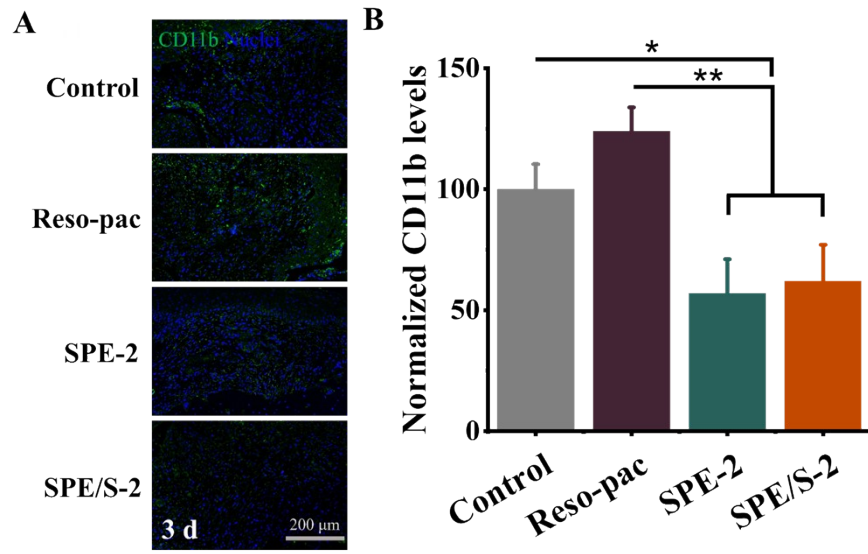

**Fig. S6.** (A) Immunofluorescence of the palate defects with anti-CD11b (green) after 3 days. Nuclei (blue) was stained with DAPI. Scale bar: 200  $\mu$ m. (B) Quantitative analysis of cell infiltration by immunofluorescence staining for CD11b. \* $P < 0.05$ .



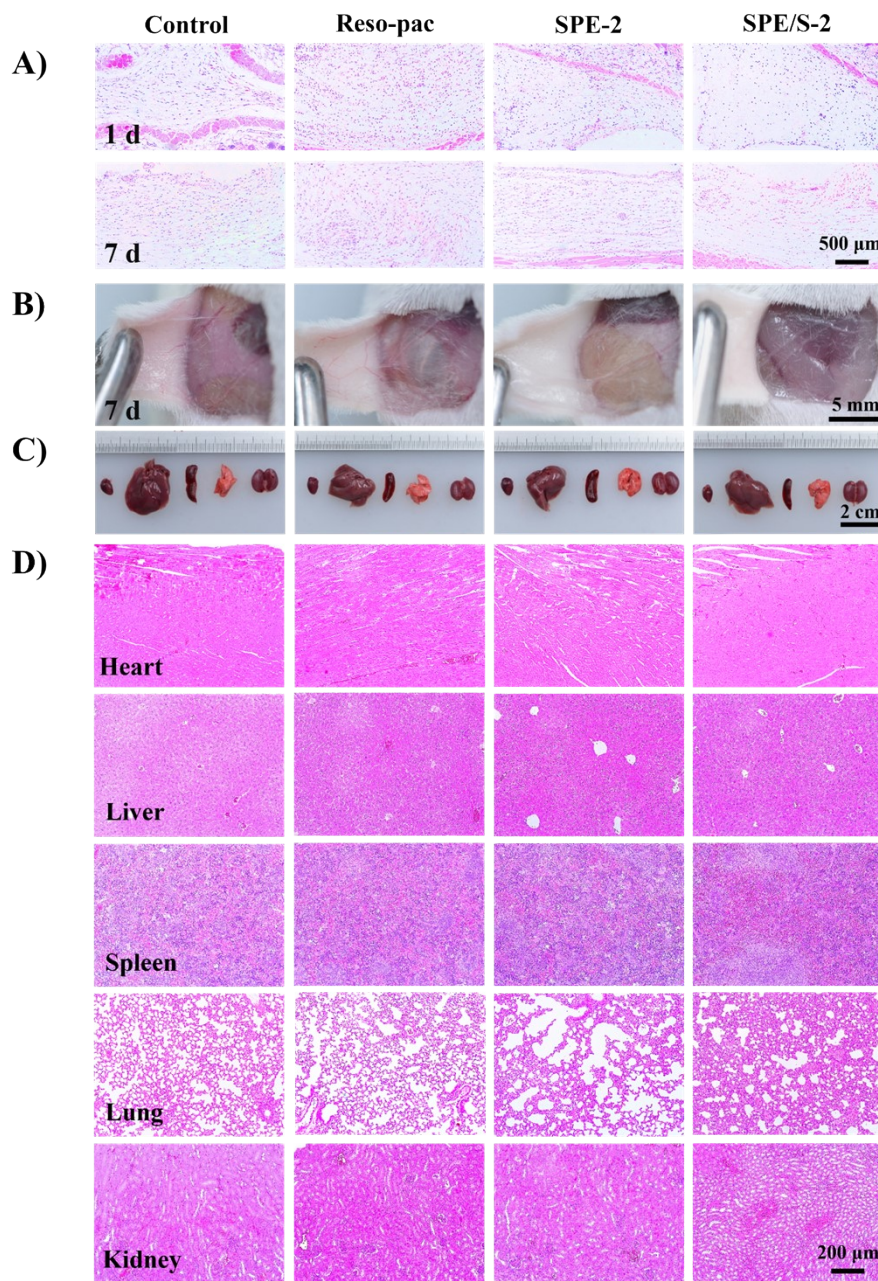

**Fig. S7.** (A) H&E staining of Kunming mice back tissue after application of different dressings after 1 and 7 days. Scale bar: 500  $\mu\text{m}$ . (B) Representative photographs of mice dorsal skin wounds after 7 days with different treatments. Scale bar: 5 mm. (C) Photographs of major organs (heart, liver, spleen, lung, and kidney) after subcutaneous implantation with different dressings in the backs of Kunming mice for 14 days. Scale bar: 2 cm. (D) H&E staining of major organs (the heart, liver, spleen, lung, and kidney) after subcutaneous implantation with different dressings for 14 days. Scale bar: 200  $\mu\text{m}$ .

**Movie S1:** The softness and adaptation ability of the SPE-2 dressing.

**Movie S2:** Adhesion of SPE-2 on porcine gingiva under pouring water. (Water pressure is

about 0.15-0.35 MPa).
